# Supplementary material
Source: publisher site journal article supplement (https://www.dovepress.com/article/221741)
Supplement: Supplementary file 1 [file get_supplementary_file.php]

Supplementary Content

**Appendix 1. Description of the Cernostics Inc.TissueCypher® Barrett’s Esophagus Assay**

The TissueCypher® Barrett’s Esophagus Assay (Cernostics, Inc., Pittsburgh, PA, USA) is a risk prediction test based on a tissue systems pathology approach to cancer diagnostics. The Assay utilizes the TissueCypher® Image Analysis Platform that quantifies an array of epithelial and stromal abnormalities as well as morphology.1, 2 The Assay involves multiplexed immunofluorescence labeling of 9 protein-based epithelial and stromal biomarkers in sections from formalin-fixed paraffin embedded tissue specimens. The fluorescently labeled slides are digitized by whole-slide fluorescence imaging, and automated image analysis software segments cellular compartments and tissue structures, then extracts quantitative expression and localization data on the biomarkers and morphology. A multivariable classifier integrates the quantitative image analysis data into individualized scores, which range from 0-10, and patients are classified into risk groups of low (0-<5.5), intermediate (≥5.5-<6.4), or high (≥6.4-10) risk for progression to HGD/EAC within 5 years.

The risk prediction test was developed and validated in a nested case-control study (n=366) that utilized a cohort of BE patients with clinical outcome data from four institutions in the US and the Netherlands. 3 Progressors were defined as patients who progressed from subspecialist confirmed ND, indefinite for dysplasia (IND) or LGD to HGD/EAC in ≥1 year, and non-progressors were patients with ND, IND or LGD with surveillance data showing no progression (median 5.9 years surveillance). A multivariable risk classifier was developed in a training set to integrate quantitative image analysis data from 9 protein-based biomarkers and nuclear morphology into a risk score, which ranges from 0-10, and risk classes of low-, intermediate- or high-risk for progression to HGD/EAC within 5 years. The risk prediction test parameters were locked in the training phase of the study, then tested in a separate validation set. The classifier stratified patients into low-, intermediate- and high-risk classes (hazard ratio (HR), 9.42; 95% confidence interval (C.I.), 4.6–19.24 (high-risk vs low-risk); p<0.0001), and also provided independent predictive information that outperformed predictions based on clinical variables, including subspecialist pathologist diagnosis. This first validation study demonstrated the ability of the test to predict incident progression in BE. In addition to predicting future risk of progression in BE, there is also a clinical need to identify prevalent HGD/EAC that may be missed by random sampling in BE. In a second study, the same risk prediction test (with all parameters locked) was evaluated in ND, IND and LGD biopsies from BE patients diagnosed with HGD/EAC on repeat endoscopy (prevalent cases, n=30, median time to HGD/EAC diagnosis 140.5 days) and non-progressors (n=145). The test stratified prevalent cases and non-progressor patients into risk classes (odds ratio (OR), 46.0; 95% C.I., 14.86-169 (high-risk vs low-risk); p<0.0001), and also provided independent predictive information that outperformed the subspecialist and generalist diagnosis. The results of this second validation study indicated that the risk prediction test may provide an objective method to identify prevalent HGD/EAC and facilitate earlier identification of BE patients requiring therapeutic intervention. 4 These two studies were retrospective nested case-control studies, which are Type D, level IV studies according to the grading system for studies using archived specimens in the evaluation of prognostic and predictive biomarkers, as described by Simon et al., 2009.5

**Appendix 2. Natural History of Barrett’s Esophagus without Surveillance**

In the absence of endoscopic surveillance for Barrett’s esophagus, high grade dysplasia and esophageal adenocarcinoma are diagnosed if symptoms prompt

endoscopic evaluation. High grade dysplasia is treated endoscopically with eradication therapy including radiofrequency ablation, cryotherapy, and endoscopic mucosal resection. Depending on the stage of cancer at the time of detection , endoscopic eradication, esophagectomy, chemoradiotherapy, or palliative therapy are indicated, and survival rates depend upon the stage of cancer at detection. The number of new cases of esophageal cancer is 4.7 per 100,000 men and women per year, and approximately 67% of those cases are adenocarcinoma-type for which Barrett’s esophagus is a precursor.6

References

**1.** Prichard JW, Davison JM, Campbell BB, et al. TissueCypher: A Systems Biology Approach to Anatomic Pathology. *Journal of Pathology Informatics.* 2015;6:48.

**2.** DeWard A, Critchley-Thorne RJ. Systems Biology Approaches in Cancer Pathology. *Methods Mol Biol.* 2018;1711:261-273.

**3.** Critchley-Thorne RJ, Duits LC, Prichard JW, et al. A Tissue Systems Pathology Assay for High-Risk Barrett's Esophagus. *Cancer Epidemiol Biomarkers Prev.* Jun 2016;25(6):958-968.

**4.** Critchley-Thorne RJ, Davison J, Prichard JW, et al. A Tissue Systems Pathology Test Detects Abnormalities Associated with Prevalent High Grade Dysplasia and Esophageal Cancer in Barrett's Esophagus *Cancer Epidemiol Biomarkers Prev - 2016 Oct 11 Epub ahead of print.* 2016.

**5.** Simon RM, Paik S, Hayes DF. Use of archived specimens in evaluation of prognostic and predictive biomarkers. *J Natl Cancer Inst.* Nov 4 2009;101(21):1446-1452.

**6.** Patel N, Benipal B. Incidence of Esophageal Cancer in the United States from 2001-2015: A United States Cancer Statistics Analysis of 50 States. *Cureus.* Dec 10;10(12):e3709.
